# Supplementary material for: Hypersensitivity to amphetamine's psychomotor and reinforcing effects in serotonin transporter knockout rats: Glutamate in the nucleus accumbens
Source: PubMed Central journal article supplement (PMC7484509; doi:10.1111/bph.15211), 2020-08-30
Supplement: BPH-177-4532-s002.pdf [file BPH-177-4532-s002.pdf]

| Figure(s) | Effect                                                                   | F (df, error)                                                             | P                                          |
|-----------|--------------------------------------------------------------------------|---------------------------------------------------------------------------|--------------------------------------------|
| 2         | genotype x AMPH dose x time effect<br>(GG corrected)                     | $F_{(3.72, 169.63)} = 3.668$                                              | $P < 0.01$                                 |
| 2         | AMPH dose x time effect<br>(GG corrected)                                | $F_{(3.72, 169.63)} = 36.678$                                             | $P < 0.0001$                               |
| 3A and 3B | genotype x access x self-administration session effect<br>(GG corrected) | $F_{(3.500, 175.012)} = 3.951$                                            | $P < 0.01$                                 |
| 3A vs 3B  | access x self-administration session effect<br>(GG corrected)            | $F_{(3.500, 175.012)} = 15.663$                                           | $P < 0.001$                                |
| 3A        | genotype x self-administration session effect<br>(GG corrected)          | not significant: n.s.                                                     | $P > 0.05$                                 |
| 3B        | genotype x self-administration session effect<br>(GG corrected)          | $F_{(3.322, 83.058)} = 4.621$                                             | $P < 0.01$                                 |
| 4A        | access,<br>genotype<br>access x genotype                                 | $F_{(2,57)}=3.46$ , $p=0.038$<br>$F_{(1,57)}=25.57$<br>$F_{(2,57)}=18.20$ | $P < 0.05$<br>$P < 0.0001$<br>$P < 0.0001$ |
| 4B        | access,<br>genotype<br>access x genotype                                 | $F_{(2,55)}=311.50$<br>$F_{(1,55)}=83.97$<br>$F_{(2,55)}=7.425$           | $P < 0.0001$<br>$P < 0.0001$<br>$P < 0.01$ |
| 5A        | access,<br>genotype<br>access x genotype                                 | $F_{(2,57)}=10.94$<br>$F_{(1,57)}=9.349$<br>$F_{(2,57)}=3.444$            | $P < 0.0001$<br>$P < 0.01$<br>$P < 0.05$   |
| 5B        | access,<br>access x genotype                                             | $F_{(2,56)}=5.055$<br>$F_{(2,56)}=3.347$                                  | $P < 0.01$<br>$P < 0.05$                   |
| 6A        | genotype,<br>access x genotype                                           | $F_{(1,57)}=4.544$<br>$F_{(2,57)}=8.103$                                  | $P < 0.05$<br>$P < 0.001$                  |
| 6B        | access,<br>genotype<br>access x genotype                                 | $F_{(2,53)}=3.314$<br>$F_{(1,53)}=20.53$<br>$F_{(2,53)}=4.675$            | $P < 0.05$<br>$P < 0.0001$<br>$P < 0.05$   |
| 6C        | access,<br>access x genotype                                             | $F_{(2,57)}=5.137$<br>$F_{(2,57)}=11.36$                                  | $P < 0.01$<br>$P < 0.0001$                 |
| 6D        | genotype                                                                 | $F_{(1,55)}=19.76$                                                        | $P < 0.0001$                               |
| 6E        | genotype,<br>access x genotype                                           | $F_{(1,56)}=12.21$<br>$F_{(2,56)}=10.41$                                  | $P < 0.001$<br>$P < 0.001$                 |
| 6F        | access                                                                   | $F_{(2,56)}=15.03$                                                        | $P < 0.0001$                               |
| 7A        | access,<br>access x genotype                                             | $F_{(2,56)}=9.318$<br>$F_{(2,56)}=4.476$                                  | $P < 0.001$<br>$P < 0.05$                  |
| 8A        | access x genotype                                                        | $F_{(2,57)}=16.03$                                                        | $P < 0.0001$                               |
| 8B        | access,<br>genotype<br>access x genotype                                 | $F_{(2,57)}=17.17$<br>$F_{(1,57)}=17.81$<br>$F_{(2,57)}=3.571$            | $P < 0.0001$<br>$P < 0.0001$<br>$P < 0.05$ |
| 8C        | genotype,<br>access x genotype                                           | $F_{(1,57)}=13.09$<br>$F_{(2,57)}=13.79$                                  | $P < 0.001$<br>$P < 0.0001$                |
| 8D        | access,<br>genotype<br>access x genotype                                 | $F_{(2,58)}=4.995$<br>$F_{(1,58)}=15.09$<br>$F_{(2,58)}=3.301$            | $P < 0.05$<br>$P < 0.001$<br>$P < 0.05$    |
| 9A        | access,<br>access x genotype                                             | $F_{(2,57)}=4.464$<br>$F_{(2,57)}=5.152$                                  | $P < 0.05$<br>$P < 0.01$                   |
| 9B        | access,<br>access x genotype                                             | $F_{(2,57)}=7.647$<br>$F_{(2,57)}=15.86$                                  | $P < 0.01$<br>$P < 0.0001$                 |
| 9C        | access,<br>access x genotype                                             | $F_{(1,58)}=5.822$<br>$F_{(2,58)}=4.385$                                  | $P < 0.01$<br>$P < 0.05$                   |
| 9D        | access,<br>access x genotype                                             | $F_{(1,57)}=3.795$<br>$F_{(2,57)}=7.230$                                  | $P < 0.05$<br>$P < 0.01$                   |

**Supplementary table 1.** F and p values of both behavioral and molecular data presented in the results section.
